# Supplementary material for: Tumour-initiating cell-specific miR-1246 and miR-1290 expression converge to promote non-small cell lung cancer progression
Source: Springer Nature journal article supplement (doi:10.1038/ncomms11702), 2016-06-21
Supplement: 41467_2016_BFncomms11702_MOESM1295_ESM.pdf [file 41467_2016_BFncomms11702_MOESM1295_ESM.pdf]

## Supplementary Figures

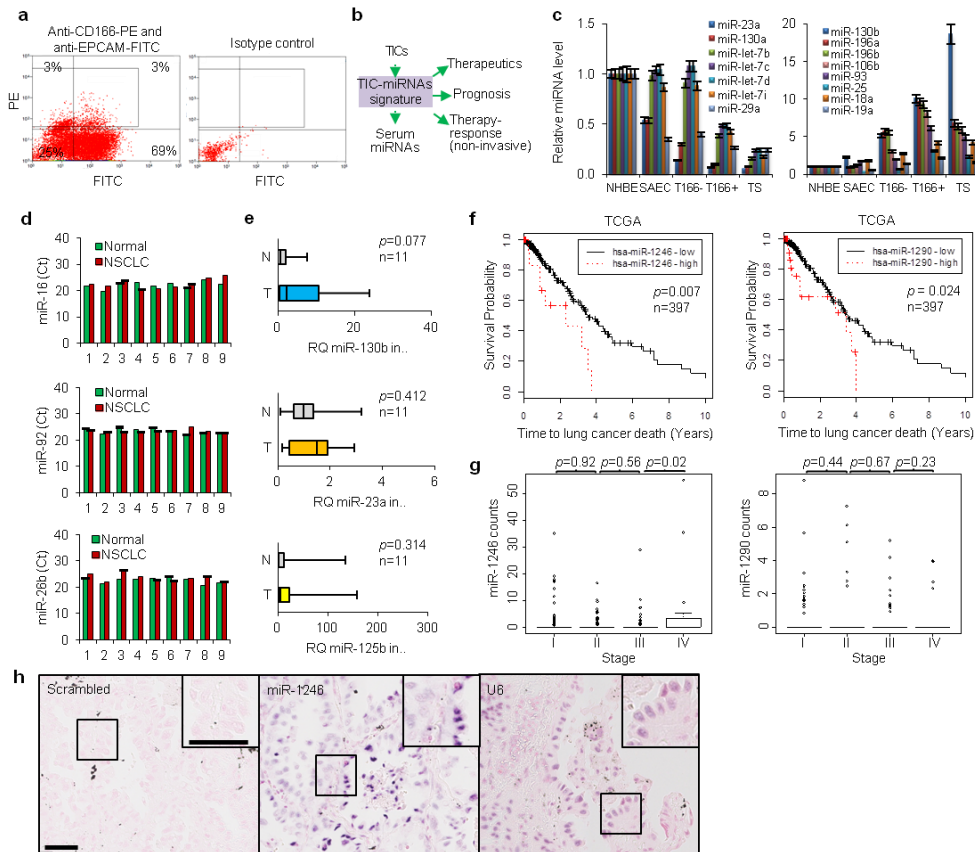

**Supplementary Fig. 1. A miRNA signature enriched in TICs in NSCLC.** (a) Flow cytometry analysis of CD166 and EPCAM in primary lung tumor (left). Isotype antibodies were applied as control (right). (b) Strategy for the identification and characterization of TIC-enriched miRNAs in NSCLC. (c) Quantitative RT-PCR analysis of candidate miRNAs listed in Fig. S1b in non-tumorigenic cells (NHBE, SAEC and T166-) and TICs (T166+ and TS) in NSCLC. Both downregulated miRNAs (left panel) and upregulated ones (right panel) are shown. The miRNAs level in NHBE was normalized as 1; n=3 replicates. (d) Quantitative RT-PCR analysis of miR-16, miR-92 and miR-26b, which are employed as endogenous controls, across primary NSCLC tumors and normal tissues. Ct, cycle threshold; n=9. (e) Quantitative RT-PCR analysis of miR-130b, miR-23a and miR-125b levels, presented as box plot, in paired tumor and normal tissues in NSCLC. The vertical line within the box indicates the median, boundaries of the box indicate the 25<sup>th</sup>- and 75<sup>th</sup>-percentile, and the whiskers indicate the highest and lowest values of the results. The median values in normal tissues were normalized as 1. N, normal; T, tumor; RQ, relative quantification; n=11. (f) Kaplan Meier curves showing the survival analyses of lung adenocarcinoma patients whose tumors express either high or low levels of miR-1246 and miR-1290 based on TCGA miRNA-Seq data. High or low expression was defined after performing normalization using the total numbers of mappable reads across all samples. TCGA, The Cancer Genome Atlas; n=397. (g) Correlation between expression of miR-1246 or miR-1290 and NSCLC stages based on TCGA miRNA-seq data. n=397. (h) ISH for miR-1246 in primary lung adenocarcinoma. Both scrambled miRNAs (left) and U6 (right) are applied as negative and positive controls, respectively. Scale bar, 50  $\mu$ m. All error bars represent  $\pm$ SEM and statistical significance was calculated using Student's *t*-test (e,g) or log-rank test (f).

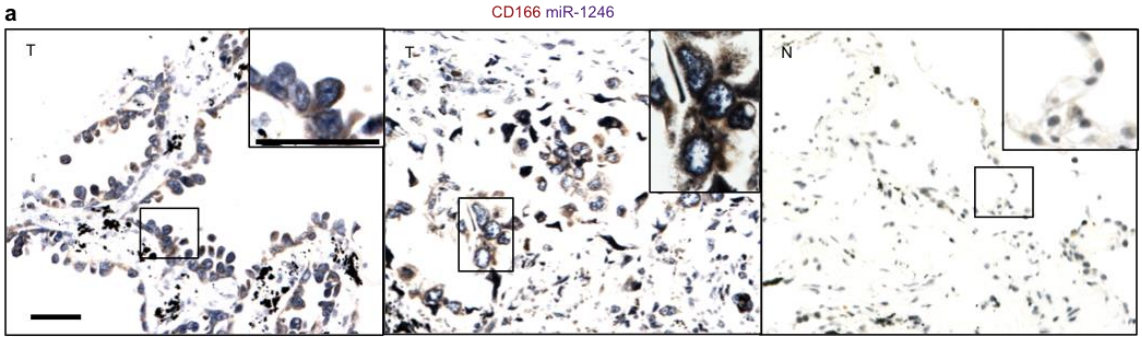

**b**

| NSCLC           | miR-1246 low | miR-1246 high |
|-----------------|--------------|---------------|
| miR-1290 low    | 21           | 19            |
| miR-1290 high   | 14           | 115           |
| <i>p</i> -value | <0.001       |               |

**Supplementary Fig. 2. Expressions of CD166 and miR-1246 in lung tumors and normal tissue. (a)** Co-staining CD166 (IHC) and miR-1246 (ISH) in lung tumors and normal tissues. Co-expression of CD166 (in brown) and miR-1246 (in purple) are shown in adenocarcinoma (T) and normal lung (N). Scale bar, 50  $\mu$ m. **(b)** The association between the intensity of miR-1246 expression and miR-1290 expression by ISH on a NSCLC tissue microarray. *p*-value was calculated using Chi-squared test; n=169.

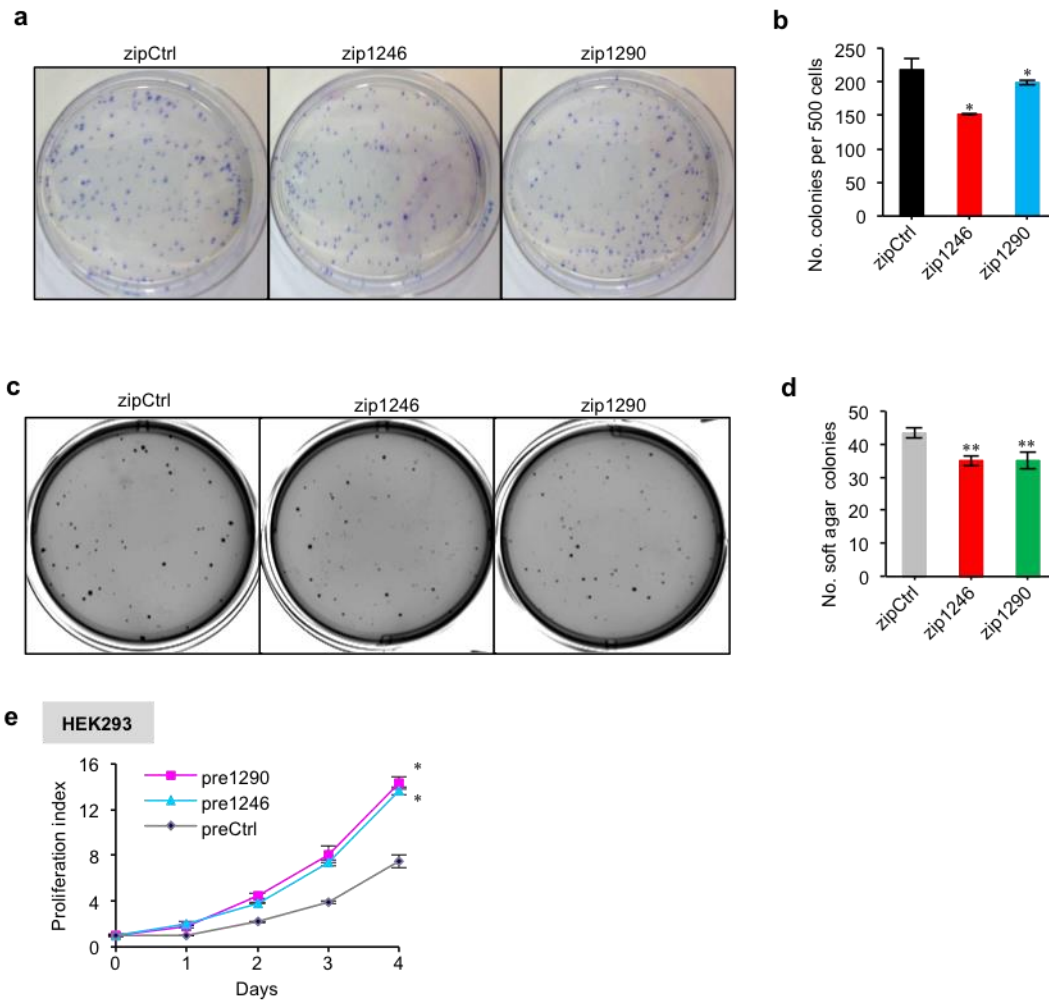

**Supplementary Fig. 3 The impact of mir-1246 or mir-1290 perturbations on *in vitro* growth.** (a) Colony formation assay in adherent conditions of tumorsphere cells treated with either zip1246 or zip1290. 500 cells were plated. (b) Quantitative analysis of the number of colonies formed under adherent conditions in Fig. S3a. n=3 replicates. (c) Soft agar colony formation assay of tumorsphere cells that treated with either zip1246 or zip1290. 500 cells were plated. Colonies were stained with INT and counted on day 28. (d) Quantitative analysis of soft agar colony formation in Fig. S3c. n=3 replicates. (e) Proliferation assay of HEK293 cells treated with either pre1246 or pre1290. 100 cells were plated and the numbers of cells were evaluated on day 1, 2, 3 and 4 by CellTiter-Glo luminescent assay. n=3 replicates. All error bars represent  $\pm$ SEM and statistical significance was calculated using Student's *t*-test; \* $p$ <0.05, \*\* $p$ <0.01.

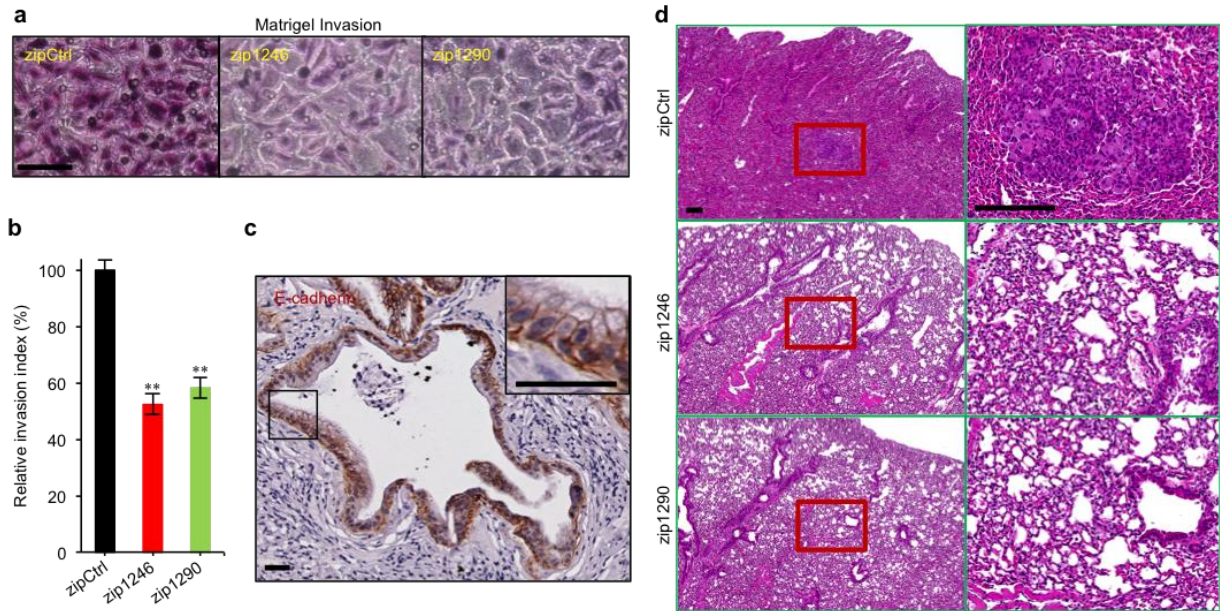

**Supplementary Fig. 4. miR-1246 or miR-1290 contribute towards lung cancer invasion and metastasis. (a)** Transwell matrigel invasion assay of tumorsphere cells treated with either zip1246 or zip1290. 40,000 cells were seeded. The invaded cells on the lower membrane of transwell inserts were stained with Giemsa and counted 30 hours after plating. Scale bar, 50  $\mu$ m. **(b)** Quantification of invasion assay as shown in Fig. S4a.  $n=3$  replicates. All error bars represent  $\pm$ SEM and statistical significance was calculated using Student's  $t$ -test; \*\* $p<0.01$ . **(c)** H&E staining for mouse lung sections as shown in Fig. 3k on day 60, following the subcutaneous injection of  $1 \times 10^6$  tumorsphere cells that were treated with either zip1246 or zip1290. Sections of lung lobes in low (left) and high magnifications (right) are shown. Scale bar, 200  $\mu$ m. **(d)** IHC staining for E-cadherin in primary lung adenocarcinoma. Staining pattern of E-cadherin (see inset) is shown in higher magnification. Scale bar, 50  $\mu$ m.

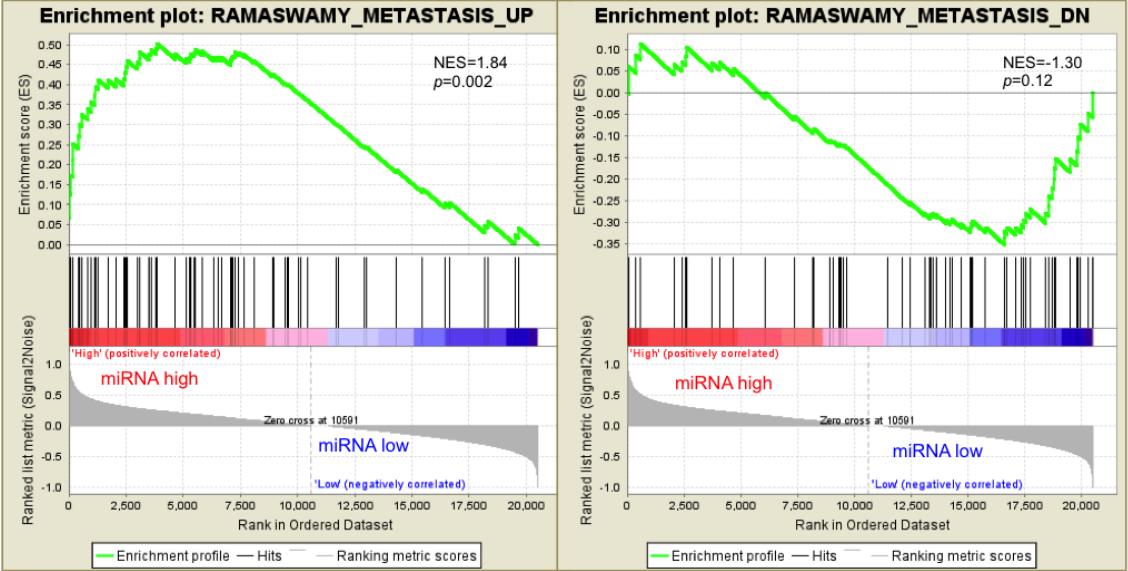

**Supplementary Fig. 5. Analysis for metastasis in patients with solid tumors including of lung adenocarcinoma based on the intensity of miRNAs expression in tumors.** Heat maps showing miR-1246 and miR-1290 of the Gene Set Enrichment Analysis (GSEA) plots. The  $p$ -values were calculated with GSEA analysis. NES, normalized enrichment score; DN, down.

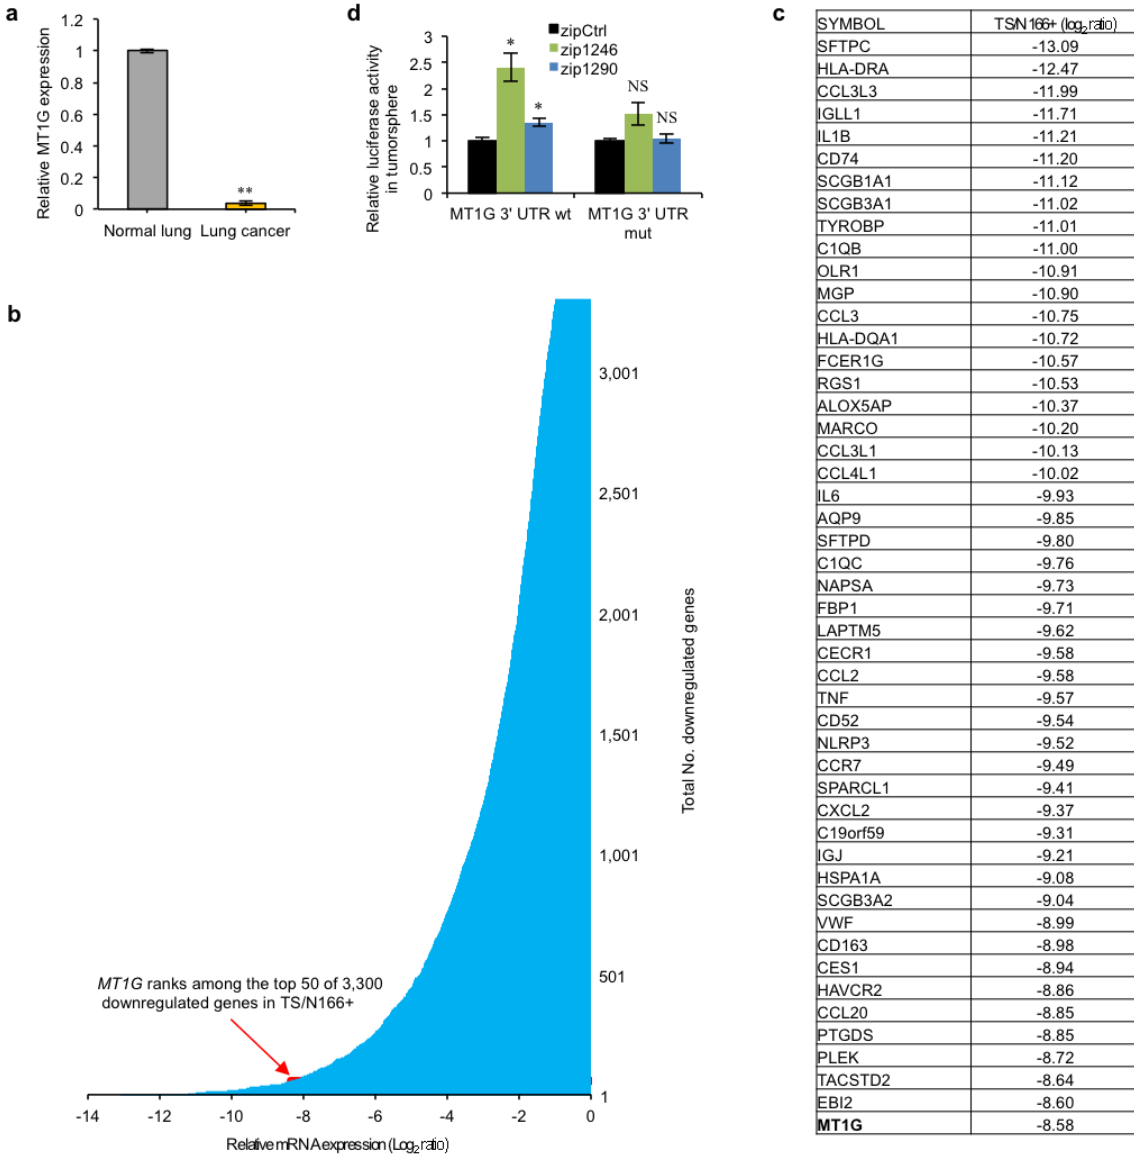

**Supplementary Fig. 6. Expression levels of *MT1G* in primary lung cancer tissues and tumorsphere cells.** (a) Quantitative RT-PCR analysis of *MT1G* in paired normal and cancerous tissues obtained from NSCLC patients. *MT1G* level in normal tissues was normalized as 1; n=9 paired tissues. (b,c) Transcriptome analyses showing downregulated gene expression in lung TICs (TS) compared with non-TICs (N166+). *MT1G* ranked among the top 50 of the 3,300 downregulated genes (b, c). TS, tumorsphere; N166+, CD166+ primary normal lung cells. n=3. (d) Luciferase activity of wild-type (UTR wt) or mutant (UTR mut) *MT1G* 3' reporter assay in tumorsphere cells transfected with zip1246, zip1290 or zipCtrl. n=3 replicates. All error bars represent  $\pm$ SEM and statistical significance was calculated using Student's *t*-test; \* $p$ <0.05, \*\* $p$ <0.01; NS, not significant.

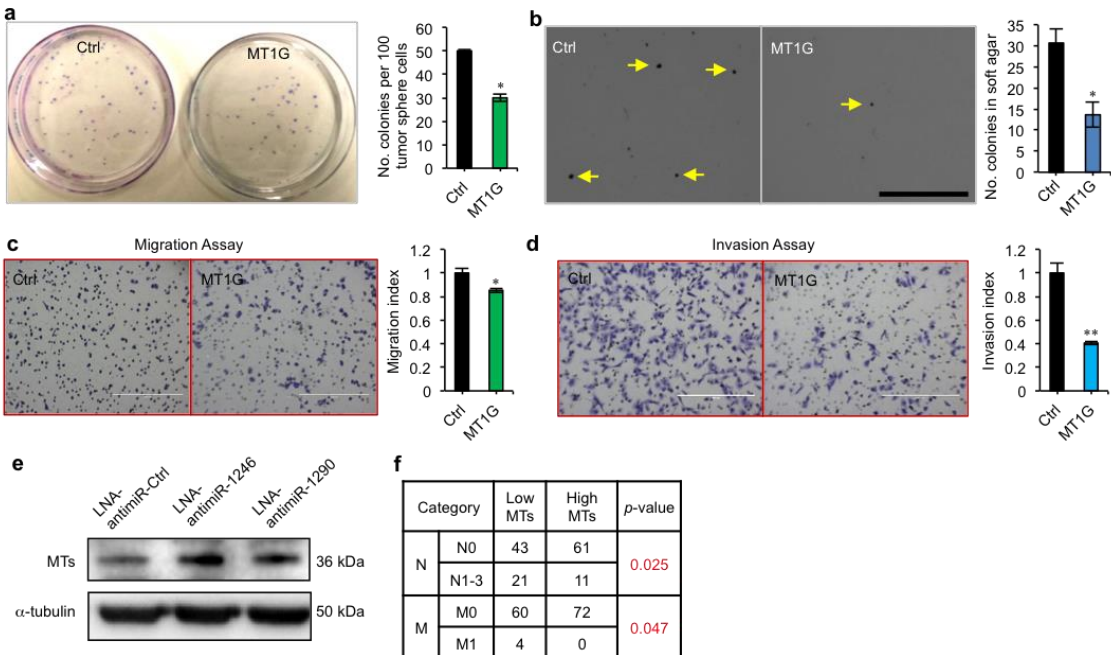

**Supplementary Fig. 7. MT1G suppresses the colony-forming and invasive abilities of NSCLC *in vitro*.** (a) Colony formation assay in adherent conditions of tumorsphere cells overexpressing MT1G or control vector. 100 cells were plated. Colonies were stained with Giemsa (left panel) and quantified (right panel) on day 9; n=3 replicates. (b) Soft agar colony formation of tumorsphere cells overexpressing MT1G or control vector. 400 cells were seeded. Colonies as indicated (→) were stained with INT (left panel) and quantified (right panel) on day 28; n=3 replicates. Scale bar, 4 mm. (c) Transwell migration assay of tumorsphere cells overexpressing MT1G or control vector. 100,000 cells were seeded. The migrated cells on the lower membrane of Inserts were stained with Giemsa (left panel) and counted (right panel) 6 hours after plating; n=3 replicates. Scale bar, 400  $\mu$ m. (d) Transwell matrigel invasion assay of tumorsphere cells overexpressing MT1G or control vector. 40,000 cells were seeded. The invaded cells on the lower membrane of transwell inserts were stained with Giemsa (left panel) and counted (right panel) 30 hours after plating; n=3 replicates. Scale bar, 400  $\mu$ m. (e) Western blot showing the expression of metallothionein (MTs) protein in subcutaneous xenograft tumors obtained from mice (in Fig. 5f) that were treated with LNA-antimiR-1246, LNA-antimiR-1290 or control.  $\alpha$ -tubulin was loaded as endogenous control. (f) The association between the intensity of MTs expression by IHC and status of regional lymph nodes (N) or distant metastasis (M) on a NSCLC tissue microarray. n=136. All error bars represent  $\pm$ SEM and statistical significance was calculated using Student's *t*-test (a,b,c,d) or Chi-squared test (f); \**p*<0.05, \*\**p*<0.01.

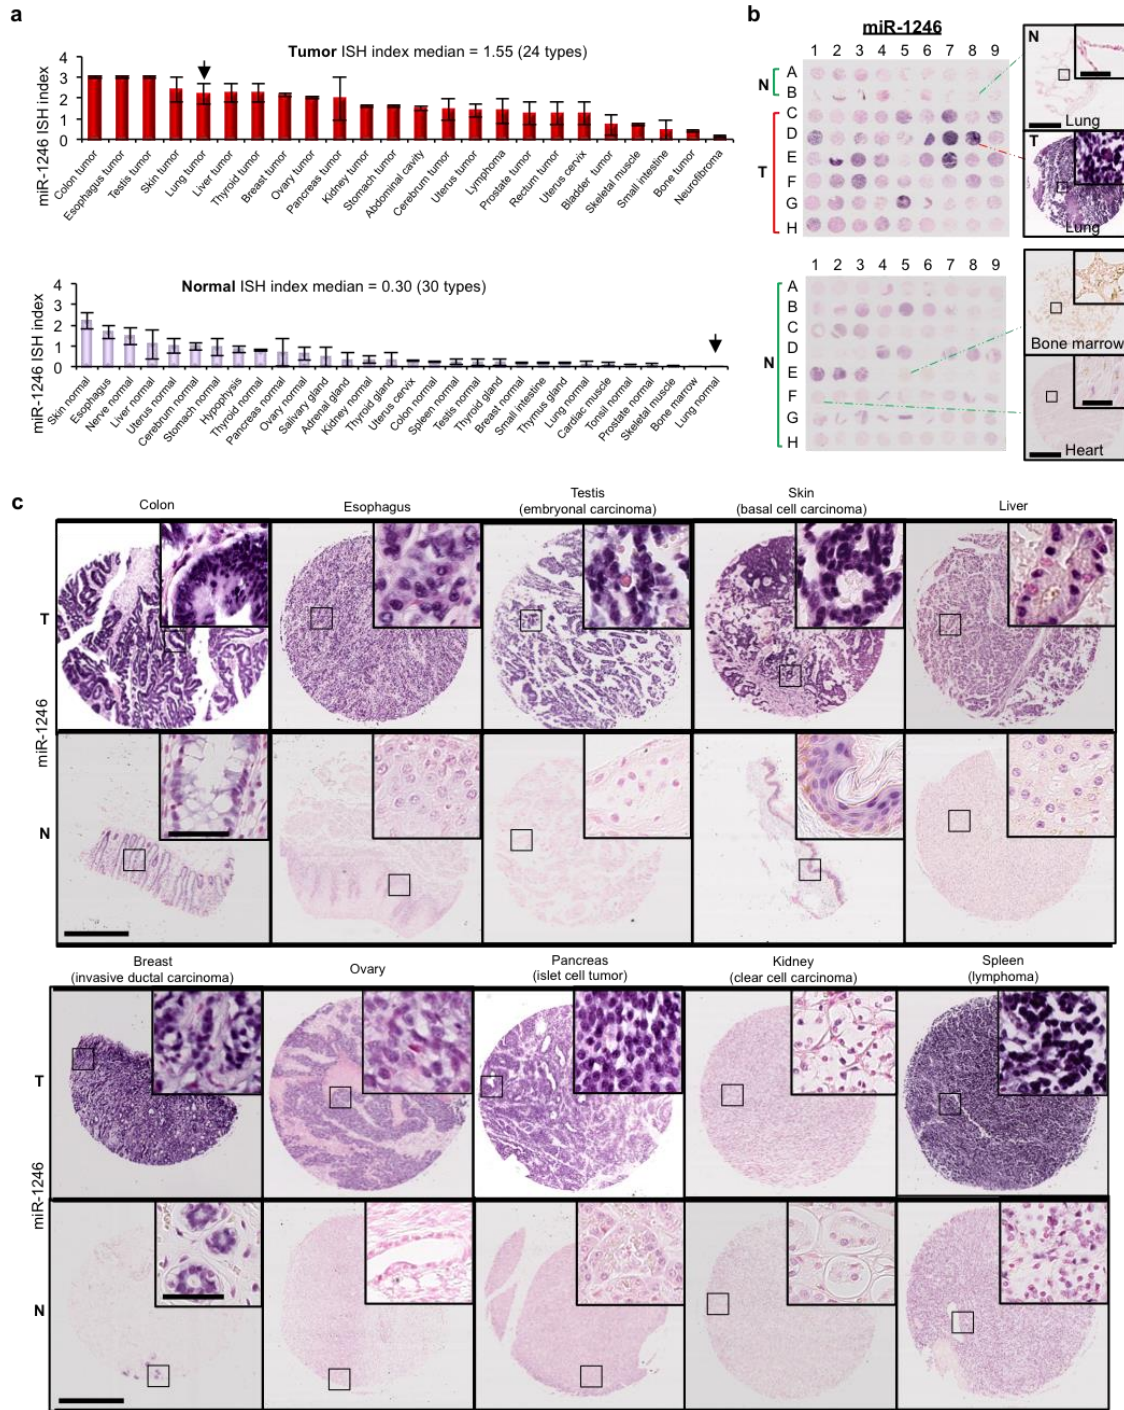

**Supplementary Fig. 8. Enriched expression of miR-1246 and miR-1290 are found in a wide variety of tumor types relative to their normal tissue counterparts. (a)** ISH index of miR-1246 expression level across different human tumor types ( $n=24$ , top panel) and normal tissues ( $n=30$ , bottom panel) on a tissue microarray (TMA). ISH index = expression intensity  $\times$  expression as percentage. All error bars represent  $\pm$ SEM;  $n=3$  replicates.  $\downarrow$ , lung. **(b)** ISH staining for miR-1246 in human tumors and normal tissues in two different TMAs. The candidate images showing miR-1246 expression in low (left panel) and high magnifications (right panel). N, normal. T, tumor. Scale bar, 600  $\mu$ m (50  $\mu$ m, inset). **(c)** ISH staining for miR-1246 in paired tumor and normal tissue samples from colon, esophagus, testis, skin and liver (top panels), and from breast, ovary, pancreas, kidney and spleen (bottom panels). Scale bar, 600  $\mu$ m (50  $\mu$ m, inset).



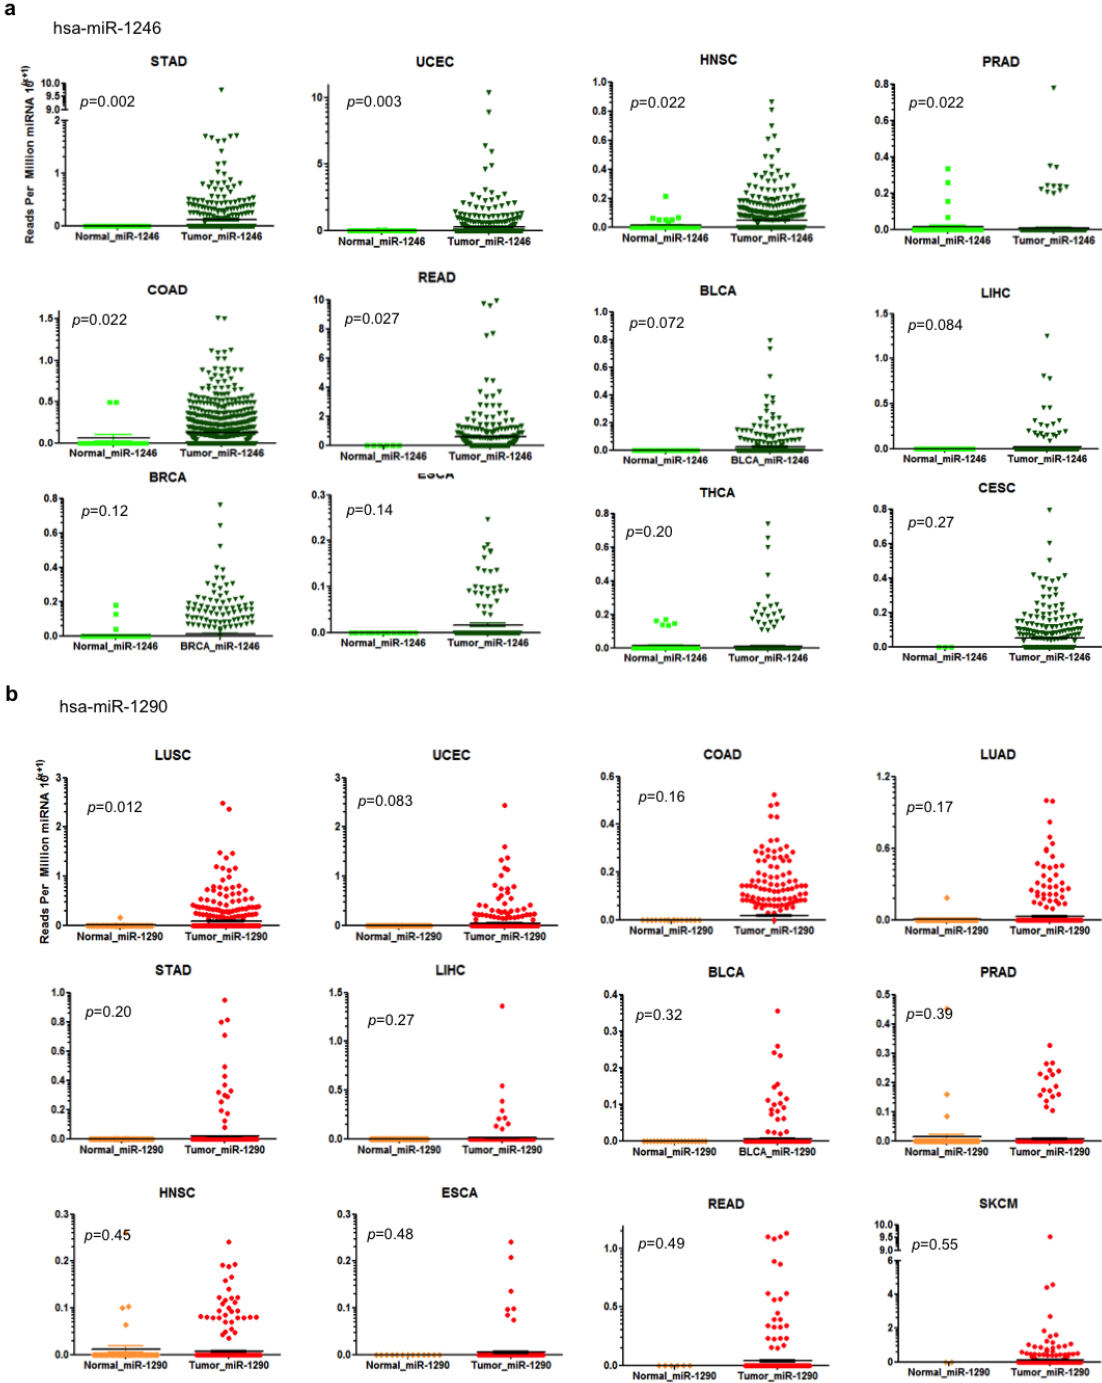

**Supplementary Fig. 9. Expression levels of miR-1246 and miR-1290 across various human tumor types based on TCGA miRNA-Seq data.** The plots showing the levels of miR-1246 (a) and miR-1290 (b) among up to 12 types of cancers relative to their normal tissues.  $p$ -values were calculated using Student's  $t$ -test.

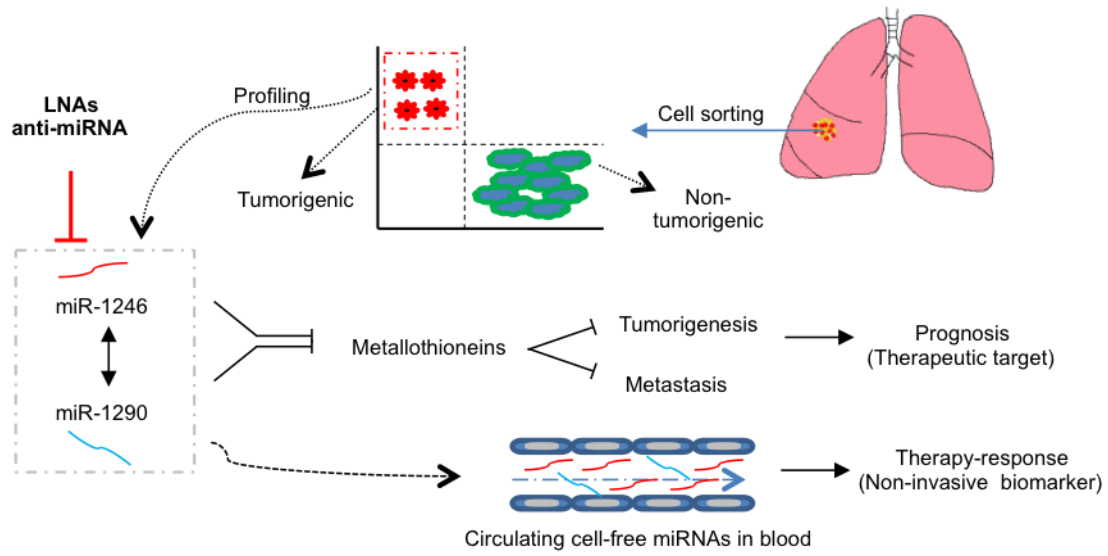

**Supplementary Fig. 10. Schematic representation of the roles of miR-1246, miR-1290 and metallothioneins in NSCLC.**

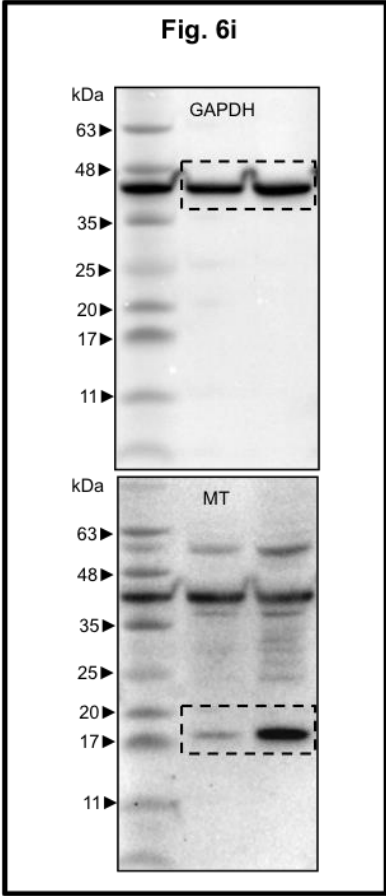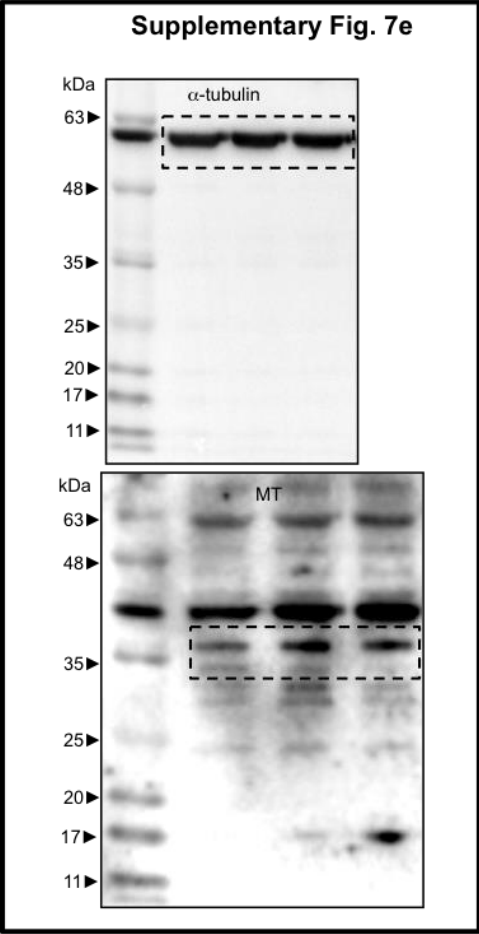

**Supplementary Figure 11.** Uncropped Western Blots, corresponding to the indicated figures in the manuscript.

## Supplementary Tables

**Supplementary Table 1. Top-most upregulated and downregulated miRNAs in tumor-initiating cells in non-small cell lung cancer**

| miRNA       | log <sub>2</sub> (TS/(NHBE/SAEC))<br>(FC, cut-off >2 or <-2) | log <sub>2</sub> (T166+/T166-) (FC, cut-off >1.5 or <-1.5) | Difference  |
|-------------|--------------------------------------------------------------|------------------------------------------------------------|-------------|
| miR-1290    | 4.5                                                          | 0.7                                                        | up (n=19)   |
| miR-130b    | 3.6                                                          | 1.0                                                        |             |
| miR-1246    | 3.6                                                          | 2.4                                                        |             |
| miR-630     | 3.1                                                          | 1.1                                                        |             |
| miR-196a    | 2.8                                                          | 0.7                                                        |             |
| miR-196b    | 2.6                                                          | 0.7                                                        |             |
| miR-9*      | 2.4                                                          | 0.7                                                        |             |
| miR-106b    | 2.4                                                          | 1.4                                                        |             |
| miR-93      | 1.9                                                          | 1.6                                                        |             |
| miR-25      | 1.9                                                          | 2.2                                                        |             |
| miR-7       | 1.8                                                          | 0.9                                                        |             |
| miR-18a     | 1.7                                                          | 0.6                                                        |             |
| miR-192     | 1.6                                                          | 0.6                                                        |             |
| miR-320c    | 1.4                                                          | 0.6                                                        |             |
| miR-19a     | 1.1                                                          | 0.6                                                        |             |
| miR-3667-5p | 1.1                                                          | 0.7                                                        |             |
| miR-483-5p  | 1.0                                                          | 0.6                                                        |             |
| miR-374a    | 1.0                                                          | 0.7                                                        |             |
| miR-96      | 1.0                                                          | 0.6                                                        |             |
| miR-377     | -1.1                                                         | -0.9                                                       | down (n=14) |
| miR-29a     | -1.3                                                         | -0.6                                                       |             |
| miR-376a    | -1.4                                                         | -0.9                                                       |             |
| miR-1260    | -1.4                                                         | -1.0                                                       |             |
| miR-99a     | -1.5                                                         | -0.7                                                       |             |
| miR-1274a   | -1.6                                                         | -0.6                                                       |             |
| miR-125b    | -1.8                                                         | -1.3                                                       |             |
| miR-513a-5p | -1.8                                                         | -0.6                                                       |             |
| let-7d      | -2.1                                                         | -1.1                                                       |             |
| let-7c      | -2.4                                                         | -1.7                                                       |             |
| let-7i      | -2.4                                                         | -1.1                                                       |             |
| let-7b      | -2.7                                                         | -1.2                                                       |             |
| miR-130a    | -3.3                                                         | -1.6                                                       |             |
| miR-23a     | -3.8                                                         | -1.0                                                       |             |

Note: TS, tumor sphere; FC, fold change; T, lung cancer patient-derived tumor cells; 166+, CD166+; 166-, CD166-.

**Supplementary Table 2. Expression of miR-1246 and miR-1290 across different human cancers based on TCGA miRNA-Seq data**

| Cancer | Description                                                      | miR-1246 (N/T) |                 | miR-1290 (N/T) |                 | No. patients |
|--------|------------------------------------------------------------------|----------------|-----------------|----------------|-----------------|--------------|
|        |                                                                  | FC             | <i>p</i> -value | FC             | <i>p</i> -value |              |
| LUSC   | Lung squamous cell carcinoma                                     | 0.574496       | 2.71E-08        | 0.080643       | 0.012091        | 504          |
| STAD   | Stomach adenocarcinoma                                           | 0.114311       | 0.00196         | 0.016124       | 0.198385        | 443          |
| UCEC   | Uterine corpus endometrial Carcinoma                             | 0.250787       | 0.002741        | 0.041955       | 0.083053        | 548          |
| LUAD   | Lung adenocarcinoma                                              | 0.107022       | 0.004347        | 0.022732       | 0.171509        | 521          |
| HNSC   | Head and neck squamous cell carcinoma                            | 0.15125        | 0.021645        | -0.01652       | 0.453623        | 528          |
| PRAD   | Prostate adenocarcinoma                                          | -0.0091        | 0.021979        | -0.00662       | 0.391253        | 498          |
| COAD   | Colon adenocarcinoma                                             | 0.343819       | 0.024155        | 0.053833       | 0.163521        | 461          |
| READ   | Rectum adenocarcinoma                                            | 0.559734       | 0.026974        | 0.038959       | 0.490673        | 171          |
| BLCA   | Bladder urothelial carcinoma                                     | 0.08001        | 0.071999        | 0.017168       | 0.319218        | 412          |
| LIHC   | Liver hepatocellular carcinoma                                   | 0.018394       | 0.083837        | 0.009056       | 0.265112        | 377          |
| BRCA   | Breast invasive carcinoma                                        | 0.030557       | 0.121647        | 0.001774       | 0.641866        | 1098         |
| ESCA   | Esophageal carcinoma                                             | 0.044802       | 0.135981        | 0.014069       | 0.483665        | 185          |
| THCA   | Thyroid carcinoma                                                | -0.00101       | 0.203217        | -0.01344       | 1.61E-05        | 507          |
| CESC   | Cervical squamous cell carcinoma and endocervical adenocarcinoma | 0.164581       | 0.26667         | 0.025542       | 0.613878        | 308          |
| SKCM   | Skin cutaneous melanoma                                          | 0.561717       | 0.347114        | 0.11688        | 0.546408        | 470          |
| KIRC   | Kidney renal clear cell carcinoma                                | 0.006704       | 0.477279        | 0.001932       | 0.617102        | 536          |
| KICH   | Kidney chromophobe                                               | 0.003051       | 0.554628        | 0              | n.a.            | 66           |
| THYM   | Thymoma                                                          | 0.046651       | 0.629116        | 0.022467       | 0.729072        | 124          |
| CHOL   | Cholangiocarcinoma                                               | 0.004948       | 0.656721        | 0              | NA              | 36           |
| PAAD   | Pancreatic adenocarcinoma                                        | 0.011378       | 0.676258        | 0.003797       | 0.852846        | 185          |
| PCPG   | Pheochromocytoma and paraganglioma                               | 0.002318       | 0.843321        | 0              | n.a.            | 179          |

Note: FC, fold change; NA, not applicable; N/T, normal versus tumor. TCGA, The Cancer Genome Atlas.

**Supplementary Table 3. Clinical pathologic characteristics of 143 study subjects based on the expression intensity of miR-1246**

| Expression of miR-1246        | Total<br>(n = 143) | Low<br>(n = 30) | High<br>(n = 113) | <i>p</i> -value |
|-------------------------------|--------------------|-----------------|-------------------|-----------------|
| Mean age (yrs)                | 63.6 (10.0)        | 65.5 (7.6)      | 63.1 (10.5)       | 0.249           |
| Gender (%)                    |                    |                 |                   |                 |
| Male                          | 97 (68)            | 23 (77)         | 74 (65)           | 0.279           |
| Female                        | 46 (32)            | 7 (23)          | 39 (35)           |                 |
| Histology (%)                 |                    |                 |                   |                 |
| Adenocarcinoma                | 97 (68)            | 11 (37)         | 87 (76)           | 0.001           |
| Squamous cell carcinoma       | 46 (32)            | 19 (63)         | 27 (24)           |                 |
| Mean tumor size (cm)          | 3.79 (2.02)        | 4.29 (2.22)     | 3.66 (1.95)       | 0.141           |
| T stage (%)                   |                    |                 |                   |                 |
| T1                            | 33 (24)            | 9 (32)          | 24 (22)           | 0.031           |
| T2                            | 71 (52)            | 18 (64)         | 53 (49)           |                 |
| T3                            | 16 (12)            | 0 (0)           | 16 (15)           |                 |
| T4                            | 16 (12)            | 1 (4)           | 15 (14)           |                 |
| N stage (%)                   |                    |                 |                   |                 |
| N0                            | 104 (76)           | 27 (93)         | 77 (72)           | 0.024           |
| N1 -3                         | 32 (24)            | 2 (7)           | 30 (28)           |                 |
| M stage (%)                   |                    |                 |                   |                 |
| M0                            | 132 (97)           | 29 (100)        | 103 (96)          | 0.578           |
| M1                            | 4 (3)              | 0 (0)           | 4 (4)             |                 |
| AJCC stage (%)                |                    |                 |                   |                 |
| I                             | 81 (61)            | 27 (96)         | 54 (51)           | < 0.001         |
| II                            | 24 (18)            | 0 (0)           | 24 (23)           |                 |
| III                           | 23 (17)            | 1 (4)           | 22 (21)           |                 |
| IV                            | 5 (4)              | 0 (0)           | 5 (5)             |                 |
| Grade (%)                     |                    |                 |                   |                 |
| Well-differentiated           | 9 (6)              | 3 (10)          | 6 (5)             | 0.522           |
| Moderately differentiated     | 74 (53)            | 13 (43)         | 61 (55)           |                 |
| Poorly differentiated         | 46 (33)            | 12 (40)         | 34 (31)           |                 |
| Undifferentiated              | 11 (8)             | 2 (7)           | 9 (8)             |                 |
| Status (%)                    |                    |                 |                   |                 |
| Alive                         | 66 (46)            | 18 (60)         | 48 (42)           | 0.022           |
| Lung cancer related death     | 63 (44)            | 7 (23)          | 56 (50)           |                 |
| Non-lung cancer related death | 14 (10)            | 5 (17)          | 9 (8)             |                 |

**Supplementary Table 4. Clinical pathologic characteristics of 143 study subjects based on the expression intensity of miR-1290**

| Expression of miR-1290        | Low<br>(n = 33) | High<br>(n = 110) | <i>p</i> -value |
|-------------------------------|-----------------|-------------------|-----------------|
| Mean age (yrs)                | 64.6 (7.7)      | 63.3 (10.6)       | 0.523           |
| Gender (%)                    |                 |                   | 0.835           |
| Male                          | 23 (70)         | 74 (67)           |                 |
| Female                        | 10 (30)         | 36 (33)           |                 |
| Histology (%)                 |                 |                   | 0.033           |
| Adenocarcinoma                | 17 (52)         | 80 (73)           |                 |
| Squamous cell carcinoma       | 16 (48)         | 30 (27)           |                 |
| Mean tumor size (cm)          | 3.27 (1.73)     | 3.95 (2.08)       | 0.101           |
| T stage (%)                   |                 |                   | 0.001           |
| T1                            | 12 (39)         | 21 (20)           |                 |
| T2                            | 19 (61)         | 52 (50)           |                 |
| T3                            | 0 (0)           | 16 (15)           |                 |
| T4                            | 0 (0)           | 16 (15)           |                 |
| N stage (%)                   |                 |                   | 0.001           |
| N0                            | 31 (97)         | 73 (70)           |                 |
| N1 -3                         | 1 (3)           | 31 (30)           |                 |
| M stage (%)                   |                 |                   | 0.573           |
| M0                            | 32 (100)        | 100 (96)          |                 |
| M1                            | 0 (0)           | 4 (4)             |                 |
| AJCC stage (%)                |                 |                   | < 0.001         |
| I                             | 31 (100)        | 50 (49)           |                 |
| II                            | 0 (0)           | 24 (24)           |                 |
| III                           | 0 (0)           | 23 (23)           |                 |
| IV                            | 0 (0)           | 5 (5)             |                 |
| Grade (%)                     |                 |                   | 0.453           |
| Well-differentiated           | 4 (12)          | 5 (5)             |                 |
| Moderately differentiated     | 16 (48)         | 58 (54)           |                 |
| Poorly differentiated         | 10 (30)         | 36 (34)           |                 |
| Undifferentiated              | 3 (9)           | 8 (7)             |                 |
| Status (%)                    |                 |                   | 0.567           |
| Alive                         | 17 (52)         | 49 (45)           |                 |
| Lung cancer related death     | 12 (36)         | 51 (46)           |                 |
| Non-lung cancer related death | 4 (12)          | 10 (9)            |                 |

**Supplementary Table 5. Association between CD166 expression and miR-1246 or miR-1290 expression**

|                 | CD166 (0~2+) | CD166 (3+) | <i>p</i> -value |
|-----------------|--------------|------------|-----------------|
| miR-1246 (0~2+) | 154          | 19         | 0.004           |
| miR-1246 (3+)   | 14           | 8          |                 |
| miR-1290 (0~2+) | 123          | 18         | 0.022           |
| miR-1290 (3+)   | 39           | 15         |                 |

**Supplementary Table 6. Tumor response or progression to clinical therapy in NSCLC patients**

| S<br>N | Clinical assessment of patient status by CT scan (response or progression)             | Clinical therapy                                   | Patient ID               |
|--------|----------------------------------------------------------------------------------------|----------------------------------------------------|--------------------------|
| 1      | Response followed by progression (increase in tumor burden or detection of metastasis) | Continuous EGFR TKI                                | 2, 8, 120, 124, 125, 137 |
| 2      | Progression (increase in tumor burden or detection of metastasis)                      | Continuous EGFR TKI                                | 1, 105, 215              |
| 3      | Stable disease (no significant change in tumor burden and no detectable metastasis)    | Continuous EGFR TKI                                | 220                      |
| 4      | Progression followed by response (decrease in tumor burden or loss of metastasis)      | EGFR TKI, followed by chemotherapy or radiotherapy | 122, 128, 134, 218, 219  |

Note: CT, computed tomography; EGFR, epidermal growth factor receptor; TKI, tyrosine kinase inhibitor.



**Supplementary Table 7. Clinical pathologic characteristics of 143 study subjects based on the expression intensity of MT**

| Expression of MT              | Low<br>(n = 67) | High<br>(n = 76) | p-value |
|-------------------------------|-----------------|------------------|---------|
| Mean age (yrs)                | 61.4 (10.9)     | 65.5 (8.7)       | 0.014   |
| Gender (%)                    |                 |                  | 0.473   |
| Male                          | 43 (64)         | 54 (71)          |         |
| Female                        | 24 (36)         | 22 (29)          |         |
| Histology (%)                 |                 |                  | 0.007   |
| Adenocarcinoma                | 53 (79)         | 44 (58)          |         |
| SCC                           | 14 (21)         | 32 (42)          |         |
| Mean tumour size (cm)         | 3.87 (2.18)     | 3.73 (1.88)      | 0.684   |
| T stage (%)                   |                 |                  | 0.001   |
| T1                            | 11 (17)         | 22 (31)          |         |
| T2                            | 28 (44)         | 43 (60)          |         |
| T3                            | 13 (20)         | 3 (4)            |         |
| T4                            | 12 (19)         | 4 (6)            |         |
| N stage (%)                   |                 |                  | 0.025   |
| N0                            | 43 (67)         | 61 (85)          |         |
| N1 -3                         | 21 (33)         | 11 (15)          |         |
| M stage (%)                   |                 |                  | 0.047   |
| M0                            | 60 (94)         | 72 (100)         |         |
| M1                            | 4 (6)           | 0 (0)            |         |
| AJCC stage (%)                |                 |                  | < 0.001 |
| I                             | 25 (40)         | 56 (79)          |         |
| II                            | 18 (29)         | 6 (8)            |         |
| III                           | 14 (23)         | 9 (13)           |         |
| IV                            | 5 (8)           | 0 (0)            |         |
| Grade (%)                     |                 |                  | 0.059   |
| Well-differentiated           | 4 (6)           | 5 (7)            |         |
| Moderately differentiated     | 38 (58)         | 36 (48)          |         |
| Poorly differentiated         | 15 (23)         | 31 (41)          |         |
| Undifferentiated              | 8 (12)          | 3 (4)            |         |
| Status (%)                    |                 |                  | 0.912   |
| Alive                         | 32 (48)         | 34 (45)          |         |
| Lung cancer related death     | 29 (43)         | 34 (45)          |         |
| Non-lung cancer related death | 6 (9)           | 8 (10)           |         |

**Supplementary Table 8. Expression of miR-1246 and miR-1290 in a tissue microarray FDA808-2**

| position | organ           | Pathology                                                   | grade | stage | tnm    | type    | miR-1246 |          | miR-1290 |          |
|----------|-----------------|-------------------------------------------------------------|-------|-------|--------|---------|----------|----------|----------|----------|
|          |                 |                                                             |       |       |        |         | Int. (+) | Pct. (%) | Int. (+) | Pct. (%) |
| A1       | Uterus          | Normal endometrium tissue                                   | -     | -     | -      | N       | 2        | 75       | 1        | 70       |
| A2       | Uterus          | Normal endometrium tissue                                   | -     | -     | -      | N       | 3        | 90       | 3        | 90       |
| A3       | Uterus          | Normal endometrium tissue                                   | -     | -     | -      | N       | 2        | 90       | 2        | 100      |
| A4       | Uterine cervix  | Cancer adjacent normal cervical canals tissue               | -     | -     | -      | NA<br>T | 0        | 0        | 0        | 0        |
| A5       | Uterine cervix  | Normal cervical canals tissue                               | -     | -     | -      | N       | 0        | 0        | 1        | 20       |
| A6       | Uterus          | Cancer adjacent normal cervix tissue                        | -     | -     | -      | NA<br>T | 1        | 5        | 0        | 0        |
| A7       | Skeletal muscle | Normal skeletal muscle tissue                               | -     | -     | -      | N       | 1        | 80       | 0        | 0        |
| A8       | Skeletal muscle | Normal skeletal muscle tissue                               | -     | -     | -      | N       | 0        | 0        | 0        | 0        |
| A9       | Thyroid         | Normal thyroid gland tissue (with hyperplasia in follicles) | -     | -     | -      | N       | 1        | 80       | 0        | 0        |
| B1       | Skin            | Normal skin tissue                                          | -     | -     | -      | N       | 2        | 90       | 0        | 0        |
| B2       | Skin            | Normal skin tissue                                          | -     | -     | -      | N       | 3        | 100      | 0        | 0        |
| B3       | Skin            | Normal skin tissue                                          | -     | -     | -      | N       | 2        | 90       | 2        | 80       |
| B4       | Nerve           | Normal peripheral nerve tissue                              | -     | -     | -      | N       | 2        | 80       | 2        | 5        |
| B5       | Nerve           | Normal peripheral nerve tissue                              | -     | -     | -      | N       | 1        | 70       | 0        | 0        |
| B6       | Nerve           | Normal peripheral nerve tissue                              | -     | -     | -      | N       | 3        | 70       | 0        | 0        |
| B7       | Lung            | Normal lung tissue (pneumonia)                              | -     | -     | -      | N       | 0        | 0        | 0        | 0        |
| B8       | Lung            | Normal lung tissue                                          | -     | -     | -      | N       | 0        | 0        | 0        | 0        |
| B9       | Lung            | Normal lung tissue                                          | -     | -     | -      | N       | 2        | 20       | 1        | 5        |
| C1       | Cerebrum        | Glioblastoma                                                | -     | -     | -      | T       | 2        | 80       | 0        | 0        |
| C2       | Cerebrum        | Atypical meningioma                                         | -     | -     | -      | T       | 1        | 70       | 1        | 75       |
| C3       | Cerebrum        | Malignant ependymoma                                        | -     | -     | -      | T       | 1        | 80       | 2        | 80       |
| C4       | Cerebrum        | Malignant oligodendroglioma                                 | -     | -     | -      | T       | 3        | 90       | 3        | 70       |
| C5       | Ovary           | Serous adenocarcinoma                                       | 3     | II    | T2N0M0 | T       | 2        | 100      | 2        | 100      |
| C6       | Ovary           | Adenocarcinoma                                              | 3     | III   | T3N0M0 | T       | 2        | 100      | 2        | 90       |

|    |                  |                                              |   |     |           |    |   |     |      |      |
|----|------------------|----------------------------------------------|---|-----|-----------|----|---|-----|------|------|
| C7 | Pancreas         | Islet cell carcinoma                         | - |     |           | T  | 3 | 100 | 3    | 100  |
| C8 | Pancreas         | Adenocarcinoma                               | 3 | II  | T2N0M0    | T  | 1 | 90  | 2    | 90   |
| C9 | Testis           | Seminoma                                     | - | I   | T1N0M0    | T  | 3 | 100 | 3    | 100  |
| D1 | Testis           | Embryonal carcinoma                          | - | I   | T2N0M0    | T  | 3 | 100 | 1    | 65   |
| D2 | Thyroid          | Medullary carcinoma                          | - | II  | T3N0M0    | T  | 2 | 90  | n.a. | n.a. |
| D3 | Thyroid          | Papillary carcinoma                          | - | III | T2aN1M0   | T  | 3 | 90  | 2    | 10   |
| D4 | Breast           | Intraductal carcinoma with early infiltrate  | - | 0   | TisN0M0   | T  | 2 | 80  | 2    | 100  |
| D5 | Breast           | Invasive ductal carcinoma                    | 2 | Ila | T2N0M0    | T  | 2 | 90  | 3    | 90   |
| D6 | Breast           | Invasive ductal carcinoma                    | 2 | Ilb | T2N1M0    | T  | 3 | 100 | 3    | 100  |
| D7 | Spleen           | Diffuse B-cell lymphoma                      | - | -   | -         | T  | 3 | 100 | 3    | 100  |
| D8 | Lung             | Small cell undifferentiated carcinoma        | - | I   | T2N0M0    | T  | 3 | 100 | 3    | 100  |
| D9 | Lung             | Squamous cell carcinoma                      | 3 | I   | T2N0M0    | T  | 2 | 90  | 2    | 90   |
| E1 | Lung             | Adenocarcinoma                               | 2 | II  | T2N1M0    | T  | 2 | 90  | 2    | 15   |
| E2 | Esophagus        | Squamous cell carcinoma                      | 2 | Ila | T2N0M0    | T  | 3 | 100 | 2    | 70   |
| E3 | Esophagus        | Adenocarcinoma                               | 3 | Ila | T3N0M0    | T  | 3 | 100 | 2    | 90   |
| E4 | Stomach          | Mucinous adenocarcinoma                      | 3 | II  | T2N1M0    | T  | 2 | 80  | 3    | 90   |
| E5 | Small intestine  | Adenocarcinoma                               | 2 | II  | T3N0M0    | T  | 0 | 0   | n.a. | n.a. |
| E6 | Small intestine  | Malignant interstitialoma                    | - | Ilb | T2N0M0    | T  | 1 | 90  | 0    | 0    |
| E7 | Colon            | Adenocarcinoma                               | 2 | II  | T4N0M0    | T  | 3 | 100 | 3    | 100  |
| E8 | Abdominal cavity | Interstitialoma                              | - | Ilb | T2N0M0    | T  | 2 | 80  | 2    | 80   |
| E9 | Rectum           | Adenocarcinoma                               | 2 | I   | T2N0M0    | T  | 2 | 90  | 2    | 100  |
| F1 | Rectum           | Intermediate grade malignant interstitialoma | - | Ilb | T2N0M0 G2 | T  | 1 | 70  | 0    | 0    |
| F2 | Liver            | Hepatocellular carcinoma                     | 1 | III | T3N0M0    | T  | 2 | 90  | 2    | 70   |
| F3 | Liver            | Hepatoblastoma                               | - | -   | -         | T  | 3 | 90  | 3    | 100  |
| F4 | Kidney           | Clear cell carcinoma                         | 2 | I   | T1N0M0    | T  | 2 | 80  | 2    | 80   |
| F5 | Prostate         | Adenocarcinoma                               | 3 | II  | T2N0M0    | T  | 2 | 90  | 0    | 0    |
| F6 | Prostate         | Adenocarcinoma                               | 2 | II  | T2N0M0 G4 | T  | 1 | 70  | 1    | 80   |
| F7 | Uterus           | Leiomyoma                                    | - | Ila | T1bN0M0   | BT | 1 | 80  | 1    | 80   |
| F8 | Uterus           | Adenocarcinoma endometrium                   | 3 | Ila | T2aN0M0   | T  | 2 | 90  | 2    | 100  |
| F9 | Uterus           | Clear cell carcinoma with necrosis           | - | Ilb | T2bN0M0   | T  | 2 | 90  | 2    | 90   |

|    |                  |                                                             |   |      |            |    |   |     |   |    |
|----|------------------|-------------------------------------------------------------|---|------|------------|----|---|-----|---|----|
| G1 | Uterine cervix   | Squamous cell carcinoma                                     | 3 | IIIb | T1bN1M0    | T  | 1 | 70  | 1 | 40 |
| G2 | Uterine cervix   | Squamous cell carcinoma                                     | 3 | II   | T2N0M0     | T  | 2 | 90  | 2 | 90 |
| G3 | Striated muscle  | Embryonal rhabdomyosarcom of left leg                       | - | Ia   | T1aN0M0    | T  | 1 | 70  | 1 | 5  |
| G4 | Rectum           | Malignant melanoma                                          | - | II   | T4N0M0     | T  | 1 | 60  | 1 | 40 |
| G5 | Skin             | Basal cell carcinoma of head                                | - | I    | T2N0M0     | T  | 3 | 100 | 3 | 90 |
| G6 | Skin             | Squamous cell carcinoma of left chest wall                  | 2 | II   | T3N0M0     | T  | 2 | 90  | 2 | 80 |
| G7 | Soft tissue      | Neurofibroma                                                | - | -    | -          | BT | 1 | 15  | 0 | 0  |
| G8 | Retroperitoneum  | Neuroblastoma                                               | - | IIIb | T2bN0M0    | T  | 2 | 10  | 3 | 10 |
| G9 | Abdominal cavity | Malignant mesothelioma                                      | - | I    | T2N0M0     | T  | 2 | 70  | 2 | 60 |
| H1 | Mediastinum      | Diffuse B-cell lymphoma                                     | - | -    | -          | T  | 2 | 90  | 1 | 50 |
| H2 | Lymph node       | Diffuse B cell lymphoma of right thigh                      | - | -    | -          | T  | 1 | 40  | 1 | 60 |
| H3 | Lymph node       | Hodgkin's lymphoma                                          | - | -    | -          | T  | 1 | 50  | 1 | 80 |
| H4 | Pelvic cavity    | Large cell anaplastic lymphoma                              | - | -    | -          | T  | 2 | 80  | 2 | 70 |
| H5 | Bladder          | Transitional cell carcinoma                                 | 3 | II   | T3aN0M0    | T  | 2 | 60  | 2 | 75 |
| H6 | Bladder          | Low grade malignant leiomyosarcoma                          | - | Ib   | T2bN0M0 G1 | T  | 1 | 20  | 1 | 60 |
| H7 | Bone             | Osteosarcoma of right inferior extremity femur              | - | IIIb | T2N0M0     | T  | 1 | 40  | 2 | 60 |
| H8 | Retroperitoneum  | Spindle cell rhabdomyosarcoma                               | - | IIb  | T2N0M0 G2  | T  | 0 | 0   | 1 | 30 |
| H9 | Smooth muscle    | Intermediate grade malignant leiomyosarcoma of left buttock | - | IIIb | T2bN0M0    | T  | 0 | 0   | 1 | 40 |

Note: N, normal; T, malignant tumor; NAT, cancer adjacent normal; n.a., not applicable; BT, benign tumor; Grade (1, well-differentiated; 2, moderately-differentiated; 3, poorly differentiated; 4, undifferentiated); TNM grading (T, primary tumor; N, regional lymph nodes; M, distant metastasis).

**Supplementary Table 9. Expression of miR-1246 and miR-1290 in a tissue microarray FDA808-1**

| position | organ             | Pathology                       | type | miR-1246 |          | miR-1290 |          |
|----------|-------------------|---------------------------------|------|----------|----------|----------|----------|
|          |                   |                                 |      | Int. (+) | Pct. (%) | Int. (+) | Pct. (%) |
| A1       | Cerebrum          | Normal cerebrum tissue          | N    | 1        | 50       | 0        | 0        |
| A2       | Cerebrum          | Normal cerebrum tissue          | N    | 2        | 90       | 0        | 0        |
| A3       | Cerebrum          | Normal cerebrum tissue          | N    | 3        | 20       | 0        | 0        |
| A4       | Cerebellum        | Normal cerebellum tissue        | N    | 1        | 100      | 0        | 0        |
| A5       | Cerebellum        | Normal cerebellum tissue        | N    | 1        | 100      | 0        | 0        |
| A6       | Cerebellum        | Normal cerebellum tissue        | N    | 1        | 100      | 0        | 0        |
| A7       | Adrenal gland     | Normal adrenal gland tissue     | N    | 0        | 0        | 0        | 0        |
| A8       | Adrenal gland     | Normal adrenal gland tissue     | N    | 0        | 0        | 0        | 0        |
| A9       | Adrenal gland     | Normal adrenal gland tissue     | N    | 1        | 100      | 2        | 75       |
| B1       | Ovary             | Normal ovary tissue             | N    | 1        | 100      | 0        | 0        |
| B2       | Ovary             | Normal ovary tissue             | N    | 0        | 0        | 0        | 0        |
| B3       | Ovary             | Normal ovary tissue             | N    | 1        | 90       | 0        | 0        |
| B4       | Pancreas          | Normal pancreas tissue          | N    | 1        | 5        | 1        | 80       |
| B5       | Pancreas          | Normal pancreas tissue          | N    | 2        | 100      | 0        | 0        |
| B6       | Pancreas          | Normal pancreas tissue          | N    | 0        | 0        | 0        | 0        |
| B7       | Parathyroid gland | Normal thyroid gland tissue     | N    | 1        | 100      | 3        | 80       |
| B8       | Parathyroid gland | Normal thyroid gland tissue     | N    | 0        | 0        | 2        | 70       |
| B9       | Parathyroid gland | Normal parathyroid gland tissue | N    | 0        | 0        | 1        | 30       |
| C1       | Hypophysis        | Normal hypophysis tissue        | N    | 1        | 100      | 0        | 0        |
| C2       | Hypophysis        | Normal hypophysis tissue        | N    | 1        | 100      | 0        | 0        |
| C3       | Hypophysis        | Normal hypophysis tissue        | N    | 1        | 50       | 0        | 0        |
| C4       | Testis            | Normal testis tissue            | N    | 1        | 50       | 0        | 0        |
| C5       | Testis            | Normal testis tissue            | N    | 0        |          | 0        | 0        |
| C6       | Testis            | Normal testis tissue            | N    | 1        | 10       | 0        | 0        |
| C7       | Thyroid gland     | Normal thyroid gland tissue     | N    | 1        | 50       | 2        | 40       |
| C8       | Thyroid gland     | Normal thyroid gland tissue     | N    | 1        | 10       | 2        | 50       |
| C9       | Thyroid gland     | Normal thyroid gland tissue     | N    | 0        |          | 2        | 10       |
| D1       | Breast            | Normal breast tissue            | N    | 1        | 10       | 0        | 0        |
| D2       | Breast            | Normal breast tissue            | N    | 2        | 10       | 0        | 0        |
| D3       | Breast            | Normal breast tissue            | N    | 2        | 10       | 0        | 0        |
| D4       | Spleen            | Normal spleen tissue            | N    | 2        | 10       | 0        | 0        |
| D5       | Spleen            | Normal spleen tissue            | N    | 1        | 50       | 0        | 0        |
| D6       | Spleen            | Normal spleen tissue            | N    | 0        | 0        | 2        | 70       |
| D7       | Tonsil            | Normal tonsil tissue            | N    | 1        | 10       | 2        | 70       |
| D8       | Tonsil            | Normal tonsil tissue            | N    | 1        | 10       | 2        | 80       |
| D9       | Tonsil            | Normal tonsil tissue            | N    | 1        | 10       | 1;2      | 60       |
| E1       | Thymus gland      | Normal thymus gland tissue      | N    | 1        | 20       | 0        | 0        |
| E2       | Thymus gland      | Normal thymus gland tissue      | N    | 1        | 20       | 0        | 0        |
| E3       | Thymus gland      | Normal thymus gland tissue      | N    | 1        | 10       | 0        | 0        |
| E4       | Bone marrow       | Normal myeloid tissue           | N    | 0        | 0        | 0        | 0        |
| E5       | Bone marrow       | Normal myeloid tissue           | N    | 0        | 0        | 0        | 0        |

|    |                 |                                                 |   |   |     |   |    |
|----|-----------------|-------------------------------------------------|---|---|-----|---|----|
| E6 | Bone marrow     | Normal myeloid tissue                           | N | 0 | 0   | 0 | 0  |
| E7 | Lung            | Normal lung tissue                              | N | 0 | 0   | 2 | 10 |
| E8 | Lung            | Normal lung tissue                              | N | 0 | 0   | 3 | 40 |
| E9 | Lung            | Normal lung tissue                              | N | 0 | 0   | 0 | 0  |
| F1 | Heart           | Normal cardiac muscle tissue                    | N | 1 | 30  | 0 | 0  |
| F2 | Heart           | Normal cardiac muscle tissue                    | N | 0 | 0   | 0 | 0  |
| F3 | Heart           | Normal cardiac muscle tissue                    | N | 1 | 5   | 0 | 0  |
| F4 | Esophagus       | Normal esophagus tissue                         | N | 2 | 100 | 0 | 0  |
| F5 | Esophagus       | Normal esophagus tissue                         | N | 2 | 100 | 1 | 20 |
| F6 | Esophagus       | Normal esophagus tissue                         | N | 2 | 50  | 1 | 30 |
| F7 | Stomach         | Normal stomach tissue                           | N | 2 | 50  | 2 | 20 |
| F8 | Stomach         | Normal stomach tissue                           | N | 2 | 80  | 3 | 40 |
| F9 | Stomach         | Normal stomach tissue<br>(smooth muscle tissue) | N | 1 | 20  | 2 | 30 |
| G1 | Small intestine | Normal small intestine tissue                   | N | 1 | 10  | 1 | 60 |
| G2 | Small intestine | Normal small intestine tissue                   | N | 2 | 10  | 1 | 60 |
| G3 | Small intestine | Normal small intestine tissue                   | N | 2 | 10  | 2 | 75 |
| G4 | Colon           | Normal colon tissue                             | N | 2 | 10  | 0 | 0  |
| G5 | Colon           | Normal colon tissue                             | N | 3 | 10  | 2 | 10 |
| G6 | Colon           | Normal colon tissue                             | N | 2 | 10  | 1 | 25 |
| G7 | Liver           | Normal liver tissue                             | N | 1 | 80  | 1 | 80 |
| G8 | Liver           | Normal liver tissue                             | N | 0 | 0   | 2 | 75 |
| G9 | Liver           | Normal liver tissue                             | N | 3 | 80  | 3 | 90 |
| H1 | Salivary gland  | Normal salivary gland tissue                    | N | 2 | 70  | 0 | 0  |
| H2 | Salivary gland  | Normal salivary gland tissue                    | N | 0 | 0   | 1 | 15 |
| H3 | Salivary gland  | Normal salivary gland tissue                    | N | 0 | 0   | 0 | 0  |
| H4 | Kidney          | Normal kidney tissue                            | N | 0 | 0   | 1 | 10 |
| H5 | Kidney          | Normal kidney tissue                            | N | 1 | 50  | 2 | 15 |
| H6 | Kidney          | Normal kidney tissue                            | N | 1 | 50  | 1 | 10 |
| H7 | Prostate        | Normal prostate tissue                          | N | 0 | 0   | 0 | 0  |
| H8 | Prostate        | Normal prostate tissue                          | N | 0 | 0   | 2 | 90 |
| H9 | Prostate        | Normal prostate tissue                          | N | 2 | 10  | 2 | 90 |

Note: N, normal; Int., intensity; Pct., percentage; n.a., not applicable.

**Supplementary Table 10. Expression of miR-1246 and miR-1290 in eight types of cancers by ISH in a tissue microarray BC00112**

| position | organ     | Pathology                                      | grade | type | miR-1246 |          | miR-1290 |          |
|----------|-----------|------------------------------------------------|-------|------|----------|----------|----------|----------|
|          |           |                                                |       |      | Int. (+) | Pct. (%) | Int. (+) | Pct. (%) |
| A1       | Liver     | Hepatocellular carcinoma                       | I     | T    | 3        | 90       | 2        | 90       |
| A2       | Colon     | Adenocarcinoma                                 | I     | T    | 3        | 90       | 2        | 70       |
| A3       | Stomach   | Adenocarcinoma                                 | II    | T    | 2        | 60       | 0        | 0        |
| A4       | Esophagus | Squamous cell carcinoma                        | I     | T    | 3        | 70       | 2        | 20       |
| A5       | Intestine | Adenocarcinoma                                 | I     | T    | 2        | 90       | 0        | 0        |
| A6       | Pancreas  | Cancer adjacent tissue                         | -     | N    | 0        | 0        | 0        | 0        |
| A7       | Lung      | Squamous cell carcinoma                        | II    | T    | 1        | 20       | 0        | 0        |
| A8       | Epiploon  | Metastatic mucinous adenocarcinoma             | II    | Mets | 0        | 0        | 0        | 0        |
| B1       | Liver     | Hepatocellular carcinoma                       | II    | T    | 2        | 90       | 0        | 0        |
| B2       | Colon     | Adenocarcinoma                                 | I-II  | T    | 1        | 90       | 0        | 0        |
| B3       | Stomach   | Adenocarcinoma                                 | III   | T    | 2        |          | 1        | 20       |
| B4       | Esophagus | Squamous cell carcinoma                        | II    | T    | 3        | 90       | 2        | 20       |
| B5       | Intestine | Adenocarcinoma                                 | II    | T    | 1        | 90       | 0        | 0        |
| B6       | Pancreas  | Duct adenocarcinoma                            | II    | T    | 2        | 80       | 0        | 0        |
| B7       | Lung      | Squamous cell carcinoma                        | III   | T    | 3        | 80       | 1        | 10       |
| B8       | Epiploon  | Metastatic adenocarcinoma                      | III   | Mets | n.a.     | n.a.     | n.a.     | n.a.     |
| C1       | Liver     | Hepatocellular carcinoma                       | II    | T    | n.a.     | n.a.     | n.a.     | n.a.     |
| C2       | Colon     | Mucinous adenocarcinoma                        | III   | T    | 0        | 0        | 0        | 0        |
| C3       | Stomach   | Adenocarcinoma                                 | III   | T    | 3        | 50       | 0        | 0        |
| C4       | Esophagus | Squamous cell carcinoma                        | II    | T    | 2        | 50       | 1        | 80       |
| C5       | Intestine | Adenocarcinoma                                 | III   | T    | 1        | 40       | 0        | 0        |
| C6       | Pancreas  | Islet cell carcinoma                           | -     | T    | 2        | 20       | 0        | 0        |
| C7       | Lung      | Atypical carcinoid                             | -     | T    | 2        | 20       | 1        | 5        |
| C8       | Epiploon  | Metastatic adenocarcinoma                      | III   | Mets | 0        | 0        | 0        | 0        |
| D1       | Liver     | Cancer adjacent normal hepatic tissue          | -     | N    | 2        | 80       | 0        | 0        |
| D2       | Colon     | Cancer adjacent normal colonic tissue          | -     | N    | 3        | 30       | 0        | 0        |
| D3       | Stomach   | Cancer adjacent normal gastric tissue          | -     | N    | 1        | 10       | 0        | 0        |
| D4       | Esophagus | Cancer adjacent normal esophageal tissue       | -     | N    | 0        | 0        | 0        | 0        |
| D5       | Intestine | Cancer adjacent normal small intestinal tissue | -     | N    | 2        | 90       | 0        | 0        |
| D6       | Pancreas  | Cancer adjacent normal pancreatic tissue       | -     | N    | 1        | 30       | 0        | 0        |
| D7       | Lung      | Cancer adjacent normal lung tissue             | -     | N    | 0        | 0        | 0        | 0        |
| D8       | Epiploon  | Cancer adjacent normal greater omentum tissue  | -     | N    | 0        | 0        | 0        | 0        |

|    |           |                                                              |   |   |      |      |      |      |
|----|-----------|--------------------------------------------------------------|---|---|------|------|------|------|
| E1 | Liver     | Cancer adjacent normal hepatic tissue                        | - | N | 1    | 90   | 0    | 0    |
| E2 | Colon     | Cancer adjacent normal colonic tissue                        | - | N | 2    | 90   | 0    | 0    |
| E3 | Stomach   | Cancer adjacent normal gastric tissue                        | - | N | 0    | 0    | 0    | 0    |
| E4 | Esophagus | Cancer adjacent normal esophageal tissue                     | - | N | 2    | 80   | 0    | 0    |
| E5 | Intestine | Cancer adjacent normal small intestinal tissue               | - | N | n.a. | n.a. | n.a. | n.a. |
| E6 | Pancreas  | Cancer adjacent normal pancreatic tissue                     | - | N | 1    | 10   | 0    | 0    |
| E7 | Lung      | Cancer adjacent normal lung tissue                           | - | N | 0    | 0    | 0    | 0    |
| E8 | Epiploon  | Cancer adjacent normal greater omentum tissue                | - | N | 0    | 0    | 0    | 0    |
| F1 | Liver     | Cancer adjacent normal hepatic tissue                        | - | N | 2    | 80   | 0    | 0    |
| F2 | Colon     | Cancer adjacent colonic mucosa tissue (chronic inflammation) | - | N | 1    | 80   | 0    | 0    |
| F3 | Stomach   | Cancer adjacent normal gastric tissue                        | - | N | 0    | 0    | 0    | 0    |
| F4 | Esophagus | Cancer adjacent normal esophageal tissue                     | - | N | 3    | 80   | 2    | 70   |
| F5 | Intestine | Cancer adjacent normal small intestinal tissue               | - | N | 1    | 70   | 0    | 0    |
| F6 | Pancreas  | Cancer adjacent normal pancreatic tissue                     | - | N | 0    | 0    | 0    | 0    |
| F7 | Lung      | Cancer adjacent normal lung tissue                           | - | N | 0    | 0    | 0    | 0    |
| F8 | Epiploon  | Cancer adjacent normal greater omentum tissue                | - | N | 0    | 0    | 0    | 0    |

Note: N, normal; T, malignant tumor; Mets, metastasis; Int., intensity; Pct., percentage; n.a., not applicable.
